# Supplementary material for: Rethinking Colour Constancy
Source: PLOS journal article supplement (doi:10.1371/journal.pone.0135029), 2015-09-10
Supplement: S1 (10.1371/journal.pone.0135029.s001) [file journal.pone.0135029.s001]

# 1 S1 Appendix: Glossary of Terms and Symbols

| Term                                              | Notation                                                              | Definition                                                                                                                                                                                                                                                                                                                                     |
|---------------------------------------------------|-----------------------------------------------------------------------|------------------------------------------------------------------------------------------------------------------------------------------------------------------------------------------------------------------------------------------------------------------------------------------------------------------------------------------------|
| light set                                         | $\mathcal{P}$                                                         | set of positive spectral power distributions, i.e., functions $p(\lambda)$ of wavelength, integrable on the visible spectrum interval $[\lambda_{\min}, \lambda_{\max}]$ such that $p(\lambda) > 0$ for each $\lambda$                                                                                                                         |
| object set                                        | $\mathcal{X}$                                                         | set of spectral reflectance functions, i.e., functions $x(\lambda)$ of wavelength integrable on $[\lambda_{\min}, \lambda_{\max}]$ and such that $0 \leq x(\lambda) \leq 1$ .                                                                                                                                                                  |
| object-light set                                  | $\mathcal{X} \times \mathcal{P}$                                      | Cartesian product of the object and light sets, i.e., the set of all object/light pairs $(x, p)$ , $x \in \mathcal{X}$ and $p \in \mathcal{P}$ .                                                                                                                                                                                               |
| colour equivalence                                | $\approx$                                                             | equivalence relation on $\mathcal{X} \times \mathcal{P}$ such that when a pair of objects $x_1$ , and $x_2$ illuminated by lights $p_1$ , and $p_2$ , respectively, are colour equivalent, i.e., $(x_1, p_1) \approx (x_2, p_2)$ , these object/light pairs have the same colour appearance (i.e., are completely visually indistinguishable). |
| object colour                                     |                                                                       | class of colour equivalent object/light pairs                                                                                                                                                                                                                                                                                                  |
| object-colour set                                 | $\mathcal{C} = (\mathcal{X} \times \mathcal{P}) / \approx$            | set of the classes of colour equivalent object/light pairs                                                                                                                                                                                                                                                                                     |
| $i^{th}$ colour mechanism                         | $\varphi_i = \mathcal{X} \times \mathcal{P} \rightarrow \mathbf{R}^3$ | the response of $\varphi_i$ (e.g., cone photoreceptor) to an object/light pair $(x, p)$ is given by Eq. 1                                                                                                                                                                                                                                      |
| colour mechanism set                              | $\Phi = (\varphi_1, \varphi_2, \varphi_3)$                            | set of colour mechanisms                                                                                                                                                                                                                                                                                                                       |
| colour signal                                     | $\Phi_p(x) = (\varphi_1(x, p), \varphi_2(x, p), \varphi_3(x, p))$     | vector of the colour mechanism responses to $x(\lambda)$ illuminated by $p(\lambda)$                                                                                                                                                                                                                                                           |
| metamerism                                        | $\sim$                                                                | equivalence relation on $\mathcal{X} \times \mathcal{P}$ defined as $(x_1, p_1) \sim (x_2, p_2) \Leftrightarrow \Phi_{p_1}(x_1) = \Phi_{p_2}(x_2)$                                                                                                                                                                                             |
| object-colour solid under illuminant $p(\lambda)$ | $\Phi_p(\mathcal{X})$                                                 | set of colour signals produced by object set under illuminant $p(\lambda)$                                                                                                                                                                                                                                                                     |
| metamer mismatching correspondence                | $\rho$                                                                | correspondence between object-colour solids $\Phi_{p_1}(\mathcal{X})$ and $\Phi_{p_2}(\mathcal{X})$ that associates with one another the points in these two object-colour solids that are produced by a common spectral reflectance function                                                                                                  |
| metamer mismatch volume                           | $\rho(z; p_1, p_2)$                                                   | given $z$ in $\Phi_{p_1}$ , set of points in $\Phi_{p_2}(\mathcal{X})$ with which $z$ is in $\rho$ -correspondence (see Eq. 2)                                                                                                                                                                                                                 |

| Term                           | Notation                                                         | Definition                                                                                                                                                                                                                                      |
|--------------------------------|------------------------------------------------------------------|-------------------------------------------------------------------------------------------------------------------------------------------------------------------------------------------------------------------------------------------------|
| colour atlas                   | $\mathcal{A}$                                                    | a subset of the object-light set $\mathcal{X} \times \mathcal{P}$ that is in one-to-one correspondence with the object-colour set $(\mathcal{X} \times \mathcal{P}) / \approx$ .                                                                |
| object-colour atlas            | $\mathcal{A}_x$                                                  | a subset $\mathcal{A}_x$ in the object set $\mathcal{X}$ such that there is a subset $\mathcal{A}_p$ in the light set $\mathcal{P}$ (a light-colour atlas) such that $\mathcal{A}_x \times \mathcal{A}_p$ makes a colour atlas                  |
| light-colour atlas             | $\mathcal{A}_p$                                                  | a subset $\mathcal{A}_p$ in the light set $\mathcal{P}$ such that there is a subset $\mathcal{A}_x$ in the object set $\mathcal{X}$ (an object-colour atlas) such that $\mathcal{A}_x \times \mathcal{A}_p$ makes a colour atlas                |
| material-colour equivalence    | $\sim_m$                                                         | an equivalence relation on the object-colour set $\mathcal{C}$ such that the quotient set $\mathcal{C} / \sim_m$ (i.e., the set of $\sim_m$ equivalence classes) is in a one-to-one correspondence with the object-colour atlas $\mathcal{A}_x$ |
| material colour                |                                                                  | class of material-colour-equivalent object-colours                                                                                                                                                                                              |
| material-colour set            | $\mathcal{C}_m = \mathcal{C} / \sim_m$                           | set of the classes of material-colour-equivalent object-colours                                                                                                                                                                                 |
| material colour map            | $M : (\mathcal{X} \times \mathcal{P}) \rightarrow \mathcal{C}_m$ | map assigning to each object/light pair a material colour                                                                                                                                                                                       |
| asymmetric object-colour match |                                                                  | two object/light pairs $(x_1, p_1)$ and $(x_2, p_2)$ will make an asymmetric (i.e., across-illuminant) colour match if and only if $M(x_1, p_1) = M(x_2, p_2)$ .                                                                                |
| atlas sample                   |                                                                  | a finite sample of elements from an atlas (e.g., an object-colour atlas sample is a finite sample of elements from an object-colour atlas)                                                                                                      |
